# Supplementary material for: Clustered metallothionein genes are co-regulated in rice and ectopic expression of OsMT1e-P confers multiple abiotic stress tolerance in tobacco via ROS scavenging
Source: PubMed Central journal article supplement (PMC3491035; doi:10.1186/1471-2229-12-107), 2012-07-10
Supplement: 1471-2229-12-107-S4.pdf [file 1471-2229-12-107-S4.pdf]

**Table 1: Members of metallothionein family in rice**

| Earlier proposed name | Gene   | protein name | Tigr ID      | Locus            | Coordinate              | Amino Acids |
|-----------------------|--------|--------------|--------------|------------------|-------------------------|-------------|
| OsMT-I-4a             | OsMT1a | OsMT1a1      | 12012.m07613 | LOC_Os12g38270.1 | 23467876 – 23468536 (+) | 108         |
|                       |        | OsMT1a2      | 12012.m56497 | LOC_Os12g38270.2 | 23467876 – 23468352 (+) | 82          |
| OsMT-I-1b             | OsMT1b | OsMT1b       | 12003.m07212 | LOC_Os03g17870.1 | 9936480 – 9937064 (+)   | 73          |
| OsMT-I-4b             | OsMT1c | OsMT1c       | 12012.m73910 | LOC_Os12g38051.1 | 23350565 – 23349930 (-) | 80          |
| OsMT-I-4c             | OsMT1d | OsMT1d       | 12012.m07616 | LOC_Os12g38300.1 | 23481607 – 23482236 (+) | 79          |
| OsMT-I-1a             | OsMT1e | OsMT1e       | 12011.m80109 | LOC_Os11g47809.1 | 28269831 - 28270196 (+) | 75          |
|                       | OsMT1f | OsMT1f       | 12012.m07587 | LOC_Os12g38010.1 | 23319560 – 23318879 (-) | 79          |
|                       | OsMT1g | OsMT1g       | 12012.m07615 | LOC_Os12g38290.1 | 23479046 – 23479680 (+) | 77          |
|                       | OsMT2a | OsMT2a       | 12001.m07196 | LOC_Os01g05650.1 | 2691774 – 2690331 (-)   | 83          |
| OsMT-I-2c             | OsMT2b | OsMT2b1      | 12005.m28027 | LOC_Os05g02070.3 | 584010 – 584488 (+)     | 85          |
|                       |        | OsMT2b2      | 12005.m27672 | LOC_Os05g02070.4 | 584010 – 584488 (+)     | 58          |
| OsMT-I-2b             | OsMT2c | OsMT2c       | 12001.m13456 | LOC_Os01g74300.1 | 43374103 – 43374519 (+) | 81          |
|                       | OsMT2d | OsMT2d       | 13101.m00538 | LOC_Os01g05585.1 | 2665458-2664412 (+)     | 65          |
| OsMT-I-3a             | OsMT3a | OsMT3a       | 12001.m07661 | LOC_Os01g10400.2 | 5475423 – 5476251 (+)   | 61          |
| OsMT-II-1a            | OsMT4  | OsMT4        | 12010.m06732 | LOC_Os10g39610.2 | 20838860 – 20839209 (+) | 88          |
